# Supplementary material for: Open diamondoid amino-functionalized MOFs for CO2 capture
Source: Royal Society of Chemistry journal article supplement (doi:10.1039/c2cc31211e), 2012-01-01
Supplement: c2cc31211e.pdf [file c2cc31211e.pdf]

Supporting information

## **Open Diamondoid Amino-functionalized MOFs for CO<sub>2</sub> Capture**

Fei Wang, Yan-Xi Tan, Hui Yang, Yao Kang, Jian Zhang\*

State Key Laboratory of Structural Chemistry, Fujian Institute of Research on the Structure of  
Matter, the Chinese Academy of Sciences, Fuzhou, Fujian 350002, P. R. China.

E-mail: [zhj@fjirsm.ac.cn](mailto:zhj@fjirsm.ac.cn)

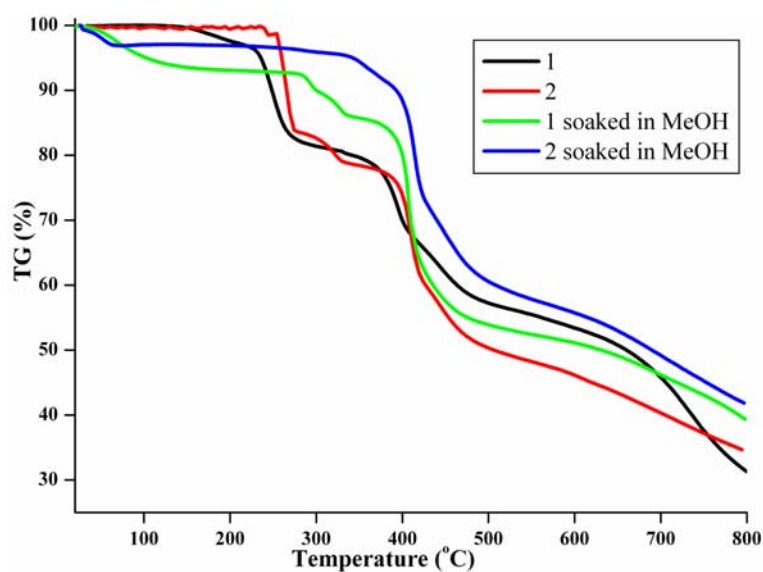

Figure S1. The TG plots of **1** and **2**.

The photoluminescence properties of **1** and **2** have been explored at room temperature in the solid state (Fig. s2). Compounds **1** and **2** display blue emission band with peak maximum at 428 nm (excitation at 350 nm). According to the previous reports about the Zn(II)-carboxyl metal-organic frameworks, the emission is tentatively assigned as originating from the ligand-to-metal charge-transfer (LMCT).

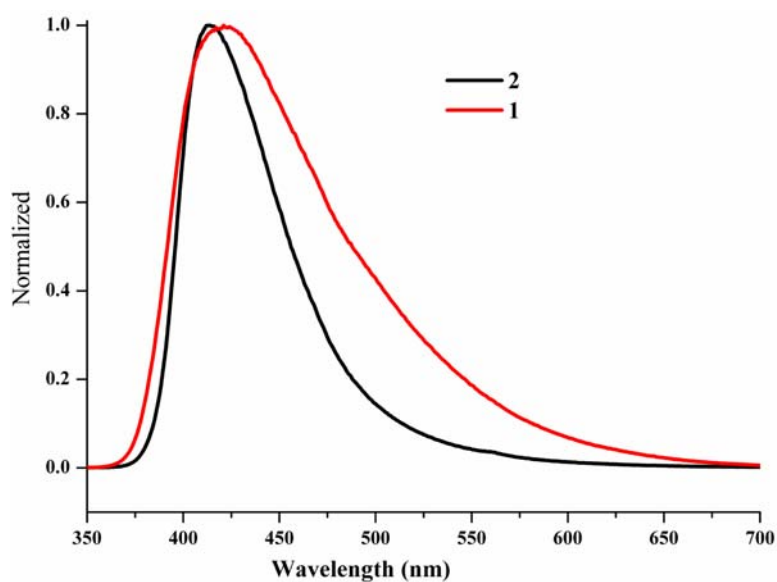

Figure S2. Emission spectra of **1** and **2** in solid state at room temperature.

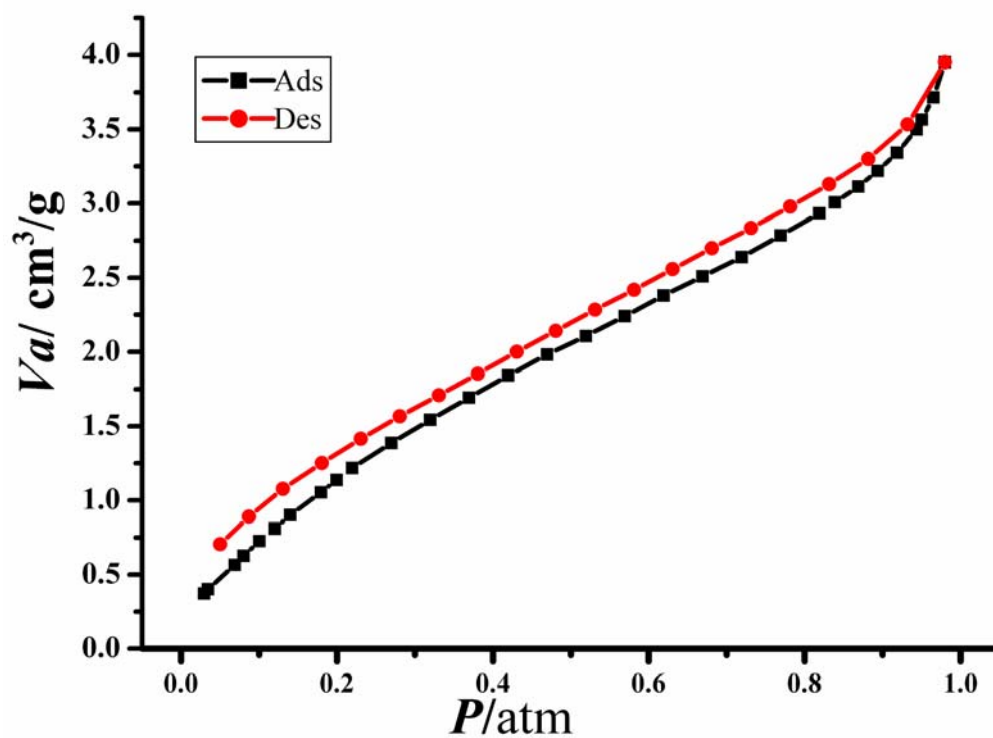

Figure S3 The  $N_2$  sorption isotherms of **2a** at 77K.

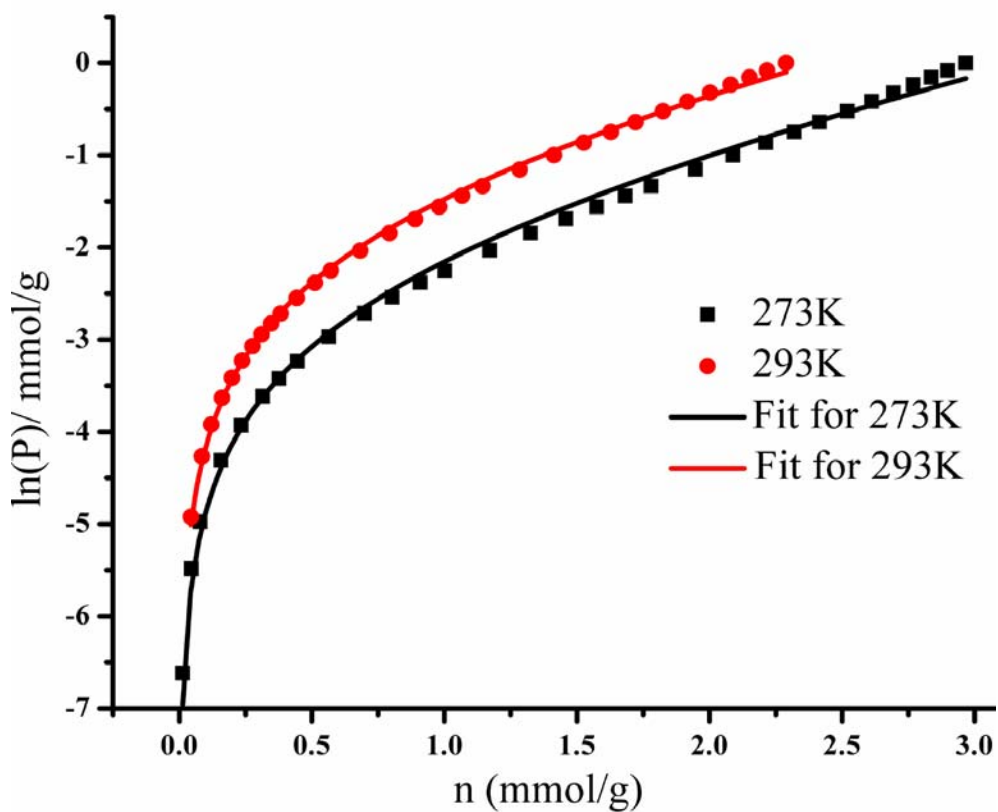

Figure S4. Virial analysis of the  $\text{CO}_2$  sorption data for **2a**. ( $a_0 = -2837.97715$ ,  $a_1 = 124.91036$ ,  $b_0 = 7.78283$ ).

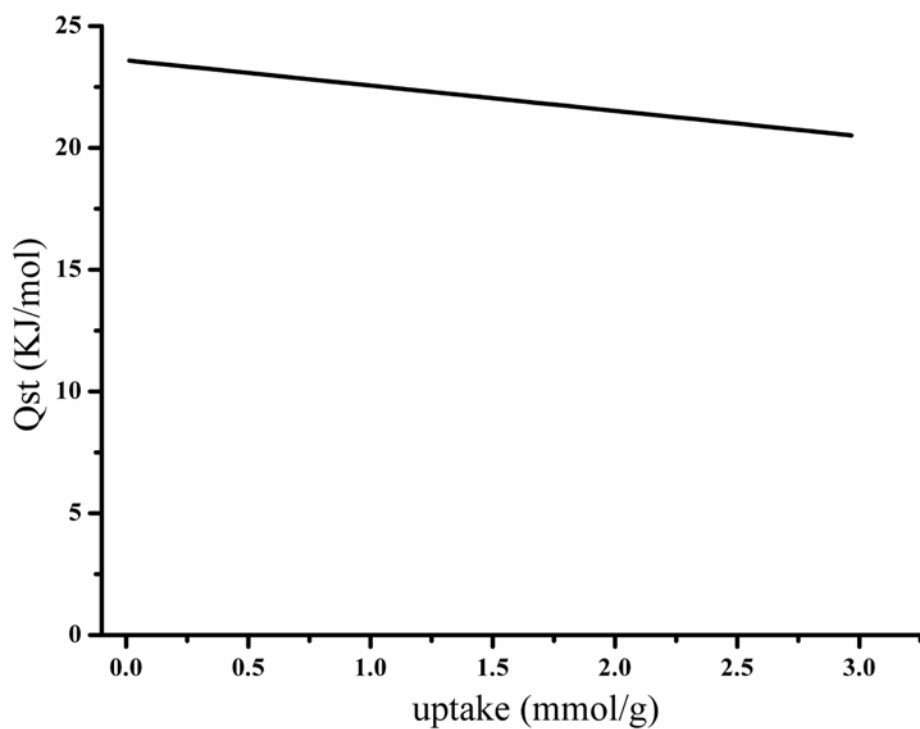

Figure S5. Heat of CO<sub>2</sub> adsorption for **2a** estimated by the virial equation.

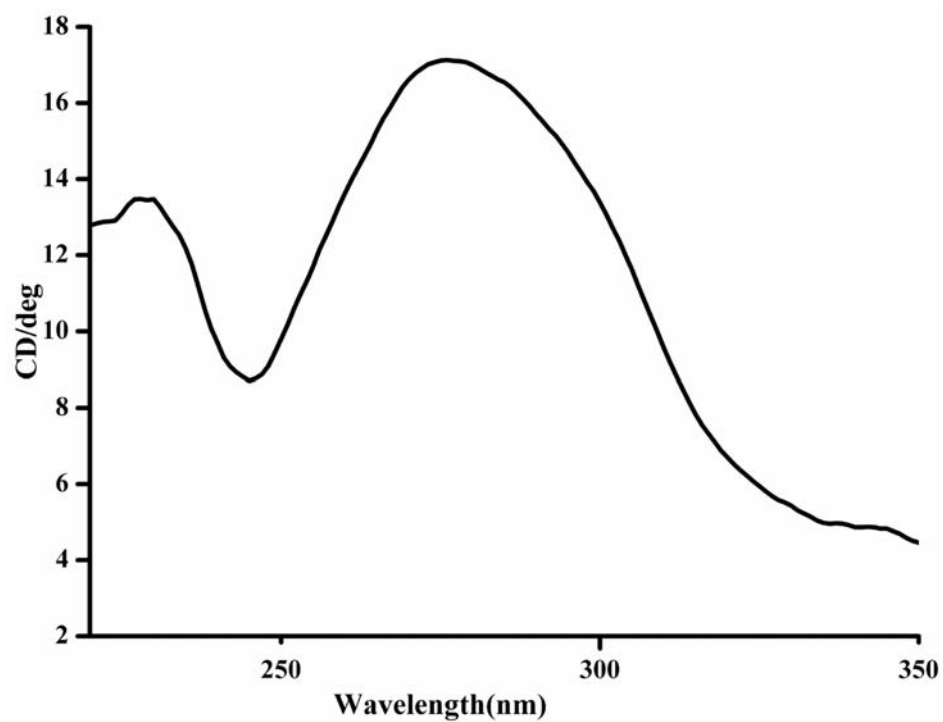

Figure S6. The solid state CD spectrum of odd crystals of **1**.
